# Supplementary material for: Effect of block copolymer architecture and composition on gold nanoparticle fabrication
Source: Royal Society of Chemistry journal article supplement (doi:10.1039/c9py00931k), 2019-01-01
Supplement: c9py00931k1.pdf [file c9py00931k1.pdf]

## Supporting Information

### Effect of Polymer Architecture and Composition on Gold Nanoparticle Fabrication

Anna P. Constantinou, Uriel Marie-Sainte, Lihui Peng, Dean R. Carroll, Catriona M.

McGilvery, Iain E. Dunlop\* and Theoni K. Georgiou\*

#### Materials and Methods

##### *Materials*

Poly(ethylene glycol) methyl methacrylate (PEGMA, MM=300 g/mol<sup>-1</sup>), 2-(diethylamino)ethyl methacrylate (DEAEMA, 99%), calcium hydride (CaH<sub>2</sub>, ≥90%), aluminum oxide activated basic (Al<sub>2</sub>O<sub>3</sub>·KOH), 2,2-diphenyl-1-picrylhydrazyl (DPPH), tetrahydrofuran (THF, HPLC grade, polymerisation solvent, ≥99.9%), 1-methoxy-1-trimethylsiloxy-2-methyl propene (MTS, polymerisation initiator), methacryloyl chloride (97%), propargyl alcohol (99%), triethylamine (99%), acetone (analytical grade), deuterated chloroform (CDCl<sub>3</sub>, 99.8%), sodium, potassium and benzoic acid (99.5%) were purchased by Aldrich, UK. Hexane (precipitation solvent) and tetrabutylammonium hydroxide (40% in water) were purchased by Acros Organics, UK. Sodium hydroxide (NaOH, 97%) and hydrochloric acid solution (volumetric, 1M) were the basic and acidic solutions for titration. Gold(III) chloride trihydrate (MM=393.83 g/mol) was the gold source used to form gold nanoparticles.

The catalyst, tetrabutylammonium bibenzoate (TBABB), was previously synthesized by tetrabutylammonium hydroxide and benzoic acid, as reported by Dicker et al and kept dried and under argon until use.<sup>1</sup> Propargyl methacrylate (PMA) was synthesised by the reaction of propargyl alcohol with methacryloyl chloride in THF in the presence of triethylamine, similarly to our previous study.<sup>2</sup>

### *Purification of Materials*

All methacrylate monomers were passed twice through basic  $\text{Al}_2\text{O}_3$  columns, stirred over  $\text{CaH}_2$  for several hours in the presence of DPPH. The monomers and the initiator were also kept under argon and stored in the fridge until they were freshly distilled before polymerization. THF was dried over sodium/potassium amalgam in an inert atmosphere.

### *Polymer Synthesis*

All block copolymers were synthesized via sequential one-pot GTP, similarly to previous studies.<sup>2-10</sup> In a 250 mL round bottom flask that was under argon 10 mg of TBABB was added, followed by injection of 60 ml freshly distilled THF. Then 0.3 mL of MTS (1.5 mmol) was syringed into the flask followed by the addition of the first monomer PEGMA (12mL in 50v/v% in THF, 6.2g, 0.021 mol). The temperature increased from 25.2 to 29.0°C. After the completion of the exothermic reaction, two 0.1 mL samples were taken out of the flask for GPC and  $^1\text{H}$  NMR analysis. Then the DEAEMA (7.7mL, 7.1g, 0.038 mol) was added and the temperature increased from 26.4 to 29.4°C. After sampling for NMR and GPC, PEGMA was added again (12mL in 50v/v% in THF, 6.2g, 0.021 mol) and the temperature increased from 26.8 to 29.6°C. GPC and NMR samples were taken. Finally, the last monomer, PMA (0.4 mL, 3 mmol) was added. The temperature increased from 28.2 to 28.5°C. Note that strictly speaking this polymer is a tetrablock but the last PMA 'block' is oligomeric and for the purpose of this study we are defining these polymers as a BAB triblock, considering only the DEAEMA (A) and PEGMA (B) blocks. The low DP for the PMA 'block' is not expected to significantly affect the properties of the polymers in solution and is present for post-polymerisation functionalisation via click chemistry. AB diblocks were prepared by adding the DEAEMA first, the PEGMA second and the PMA third. For the ABA triblock the DEAEMA was added first, then the PEGMA and PMA were added simultaneously and again the DEAEMA last. All polymers were

precipitated in cool hexane and then dried for at least 3 days in an oven at room temperature over vacuum.

### **Gold Particle Fabrication**

Seven stock polymer solutions (2 wt%) were prepared; one for each polymer. One stock solution of AuNP was also prepared at 2 wt%. A DI water solution was also prepared. Each solution was adjusted to pH 7, as discussed in the main text. As the amino group of DEAEMA can interact with the AuNP, different ratio of amino groups to gold species were varied in order to investigate the effect of the different ratio on the synthesis of polymers with gold nanoparticles. Four different molar ratios of HAuCl<sub>4</sub> to DEAEMA were chosen: 0.1, 0.3, 0.5 and 0.7. A control solution (without gold) was also prepared for each polymer. A total of 35 solutions were prepared in a matrix of 5x7. The final wt% of polymer in all the mixture solutions was set to 1 wt%. After mixing the solutions, the well-plate was left on a shaker at 200 tr/min. The samples were characterised at different time points.

### **Characterisation**

#### *GPC analysis*

The resulting, final copolymers and their precursors were analysed by GPC to obtain their molecular mass distribution and molecular mass. The GPC system used is an Agilent SECurity GPC system with a Polymer Standard Service (PSS) SDV analytical linear M column (Agilent technologies UK Ltd., Shropshire, UK). This system is equipped with a "1260 Iso" isocratic pump and an Agilent 1260 refractive index (RI) detector. THF with 5% vol triethylamine was used as the mobile phase at a flow rate of 1 mL·min<sup>-1</sup>. The column is calibrated with six different linear poly(methyl methacrylate) (PMMA) standard samples of MM 2000, 4000, 8000, 20,000, 50,000, and 100,000 g·mol<sup>-1</sup>, purchased from Fluka, Sigma Aldrich Co Ltd.

### *NMR analysis*

The final copolymers and their precursors were analysed by NMR using a 400 MHz Avance Bruker NMR spectrometer (Bruker UK Ltd., Coventry, UK). Samples were dried in a vacuum oven at room temperature and diluted with  $\text{CDCl}_3$ . The weight percentage of DEAEMA and PEGMA were calculated by the integral ratio of the signals from the  $\text{CH}_2$  ethyl group next to N and closer to ester at 2.6 ppm and the methoxy peak at 3.35 ppm, respectively.

### *Potentiometric titrations*

1% w/w aqueous polymer solutions were titrated from pH 2 to 12 using a standard 0.25 M NaOH aqueous solution. The pH change was monitored by using a portable HI98103 pH checker from Hanna instruments. The  $\text{pK}_a$  was determined as the pH at 50% protonation of DMAEMA units.<sup>4,11,12</sup>

### *Dynamic light scattering*

The hydrodynamic diameters of 1% w/w aqueous polymer solutions (in two different pHs, 7 and 8) and of the fabricated gold nanoparticles were determined by using a Zetasizer Nano ZSP (Malvern, UK) instrument. The measurements were taken at room temperature, using a backscatter angle of  $173^\circ$ . Three runs were performed for each sample and the results reported are the mean values. Before the DLS measurements, polymer the solutions were filtered through nylon 0.45  $\mu\text{m}$  PTFE syringe filters and they were left to rest to remove the bubbles.

The theoretical hydrodynamic diameters of the micelles were also calculated and compared with the corresponding experimental ones. The calculations were based on two different models. (1) In the case of the BAB and the AB block copolymers the diameter was calculated by adding twice the DP of the PEGMA (B block) with the DP of the hydrophobic DEAEMA (A block) and multiplying by the projected length of one monomer unit (0.254 nm) (2) For the

ABA block copolymers the theoretical hydrodynamic diameter was calculated by adding the DP of the PEGMA block (B block) and the DEAEMA block (A) block and multiplying by the projected length of one monomer unit (0.254 nm). For the calculations, the experimental DPs were adjusted to GPC and  $^1\text{H}$  NMR results. It should be noted that these calculations make the unrealistic assumption that chains are fully stretched, and also assume that the DEAEMA are hydrophobic thus non-ionised.

#### *Cloud point.*

An IKA RCT basic stirrer hotplate, equipped with an IKA ETS-D5 temperature controller, and a continuously stirred water bath were used for visually observing the cloud points of 1% w/w aqueous polymer solutions in glass vials. The solutions were heated from 20 to 80 °C and a visual observation was taken each degree.

#### *Visual observations and UV-Vis Spectroscopy of the Gold Nanoparticle Solutions*

Successful synthesis of polymer encapsulated AuNPs was visually confirmed by colour changes of the solutions from yellow to red. The results obtained were confirmed with by UV-vis Spectroscopy using a A SpectraMax M2 machine.

#### *Transmission Electron Microscopy (TEM)*

The TEM images were recorded by using an FEI Titan 80-300 instrument, equipped with an image corrector. The instrument operated at 80 kV and an objective aperture 70 mm in size was used in order to enhance contrast in bright field TEM mode. The TEM samples were prepared by pipetting 3.5  $\mu\text{L}$  onto holey-carbon grids. Two minutes after the addition of the solution, any excess of solvent was removed by using a filter paper. The TEM grids were held at an angle of 45°. Any remaining excess solution was removed with a filter paper, and then the grids were left to dry.

### *Synchrotron Small Angle X-ray Scattering (SAXS)*

Synchrotron SAXS was used to determine the diameter of gold nanoparticles for selected polymers of different architectures. Data were measured on beamline I22 at the Diamond Light Source, U.K,<sup>13</sup> and analysed using SANSview software,<sup>14</sup> using the SphereModel built in model,

$$P(q) = \frac{scale}{V} \left[ \frac{3V(\Delta\rho)[\sin(qR) - qR\cos(qR)]}{(qR)^3} \right] + background$$

where  $P(q)$  is the form factor,  $scale$  is a prefactor proportional to the volume fraction,  $V$  is the particle volume,  $q$  is the momentum transfer,  $R$  is the sphere radius, and  $\Delta\rho$  is the difference in scattering length density between the particle and the solvent. Polydispersity was modelled with a Gaussian distribution. Scattering length densities were taken as: gold  $126 \times 10^{-6} \text{ \AA}^{-1}$ , water  $9.44 \times 10^{-6} \text{ \AA}^{-1}$  using the NIST calculator<sup>15</sup> and tabulated densities.<sup>16</sup>

**Table S1:** Molar mass (MM) values (theoretical and experimentally determined by GPC) and dispersity indices of the polymers and their precursors.

| No. | Theoretical Polymer Structure <sup>a</sup>                                                                            | MM <sup>theor.</sup> <sup>b</sup><br>(g mol <sup>-1</sup> ) | M <sub>n</sub> <sup>c</sup><br>(g mol <sup>-1</sup> ) | M <sub>p</sub> <sup>c</sup><br>(g mol <sup>-1</sup> ) | Đ <sup>c</sup> |
|-----|-----------------------------------------------------------------------------------------------------------------------|-------------------------------------------------------------|-------------------------------------------------------|-------------------------------------------------------|----------------|
| P1  | PEGMA <sub>14</sub>                                                                                                   | 4300                                                        | 6400                                                  | 6800                                                  | 1.10           |
|     | PEGMA <sub>14</sub> - <i>b</i> -DEAEMA <sub>19</sub>                                                                  | 7900                                                        | 11400                                                 | 13000                                                 | 1.12           |
|     | PEGMA <sub>14</sub> - <i>b</i> -DEAEMA <sub>19</sub> - <i>b</i> -PEGMA <sub>14</sub>                                  | 12100                                                       | 17100                                                 | 21100                                                 | 1.19           |
|     | PEGMA <sub>14</sub> - <i>b</i> -DEAEMA <sub>19</sub> - <i>b</i> -PEGMA <sub>14</sub> - <i>b</i> -PMA <sub>2</sub>     | 12348                                                       | 17400                                                 | 21900                                                 | 1.19           |
| P2  | PEGMA <sub>12</sub>                                                                                                   | 3700                                                        | 5100                                                  | 5600                                                  | 1.11           |
|     | PEGMA <sub>12</sub> - <i>b</i> -DEAEMA <sub>26</sub>                                                                  | 8500                                                        | 11000                                                 | 12400                                                 | 1.15           |
|     | PEGMA <sub>12</sub> - <i>b</i> -DEAEMA <sub>26</sub> - <i>b</i> -PEGMA <sub>12</sub>                                  | 12100                                                       | 15800                                                 | 19200                                                 | 1.20           |
|     | PEGMA <sub>12</sub> - <i>b</i> -DEAEMA <sub>26</sub> - <i>b</i> -PEGMA <sub>12</sub> - <i>b</i> -PMA <sub>2</sub>     | 12348                                                       | 15400                                                 | 19500                                                 | 1.22           |
| P3  | PEGMA <sub>10</sub>                                                                                                   | 3100                                                        | 4900                                                  | 5500                                                  | 1.10           |
|     | PEGMA <sub>10</sub> - <i>b</i> -DEAEMA <sub>32</sub>                                                                  | 9100                                                        | 12200                                                 | 14600                                                 | 1.14           |
|     | PEGMA <sub>10</sub> - <i>b</i> -DEAEMA <sub>32</sub> - <i>b</i> -PEGMA <sub>10</sub>                                  | 12100                                                       | 16100                                                 | 20100                                                 | 1.21           |
|     | PEGMA <sub>10</sub> - <i>b</i> -DEAEMA <sub>32</sub> - <i>b</i> -PEGMA <sub>10</sub> - <i>b</i> -PMA <sub>2</sub>     | 12348                                                       | 17100                                                 | 20900                                                 | 1.19           |
| P4  | DEAEMA <sub>19</sub>                                                                                                  | 3700                                                        | 5000                                                  | 5500                                                  | 1.08           |
|     | DEAEMA <sub>19</sub> - <i>b</i> -PEGMA <sub>28</sub>                                                                  | 12100                                                       | 15000                                                 | 17900                                                 | 1.19           |
|     | DEAEMA <sub>19</sub> - <i>b</i> -PEGMA <sub>28</sub> - <i>b</i> -PMA <sub>2</sub>                                     | 12348                                                       | 14700                                                 | 17900                                                 | 1.20           |
| P5  | DEAEMA <sub>26</sub>                                                                                                  | 4900                                                        | 7400                                                  | 8100                                                  | 1.08           |
|     | DEAEMA <sub>26</sub> - <i>b</i> -PEGMA <sub>24</sub>                                                                  | 12100                                                       | 16800                                                 | 20300                                                 | 1.15           |
|     | DEAEMA <sub>26</sub> - <i>b</i> -PEGMA <sub>24</sub> - <i>b</i> -PMA <sub>2</sub>                                     | 12348                                                       | 16500                                                 | 19400                                                 | 1.17           |
| P6  | DEAEMA <sub>32</sub>                                                                                                  | 6100                                                        | 8700                                                  | 9500                                                  | 1.08           |
|     | DEAEMA <sub>32</sub> - <i>b</i> -PEGMA <sub>20</sub>                                                                  | 12100                                                       | 16000                                                 | 18100                                                 | 1.12           |
|     | DEAEMA <sub>32</sub> - <i>b</i> -PEGMA <sub>20</sub> - <i>b</i> -PMA <sub>2</sub>                                     | 12348                                                       | 16400                                                 | 19200                                                 | 1.12           |
| P7  | DEAEMA <sub>10</sub>                                                                                                  | 1900                                                        | 2700                                                  | 3000                                                  | 1.11           |
|     | DEAEMA <sub>10</sub> - <i>b</i> -(PEGMA <sub>28</sub> - <i>co</i> -PMA <sub>2</sub> )                                 | 10448                                                       | 12200                                                 | 15500                                                 | 1.24           |
|     | DEAEMA <sub>10</sub> - <i>b</i> -(PEGMA <sub>28</sub> - <i>co</i> -PMA <sub>2</sub> )- <i>b</i> -DEAEMA <sub>10</sub> | 12348                                                       | 13900                                                 | 18600                                                 | 1.29           |

<sup>a</sup> PEGMA, DEAEMA and PMA stand for penta(ethylene glycol)methyl ether methacrylate, 2-(diethylamino)ethyl methacrylate, and propargyl methacrylate, respectively.

<sup>b</sup> The theoretical molar mass values have been calculated by adding the product of the molar mass of each repeated unit by the degree of polymerisation. 100 g mol<sup>-1</sup> corresponds to the part of the initiator that stays on the polymer chain after the completion of the polymerisation, thus it is added to the result.

<sup>c</sup> The values of the number-average molar mass ( $M_n$ ), the molar mass that corresponds to the maximum of the peak ( $M_p$ ), and the dispersity indices ( $\text{Đ}$ ) are based on a linear calibration using well-defined poly(methyl methacrylate) standard samples of molar mass equal to 2000, 4000, 8000, 20000, 50000, 100000 g mol<sup>-1</sup>.

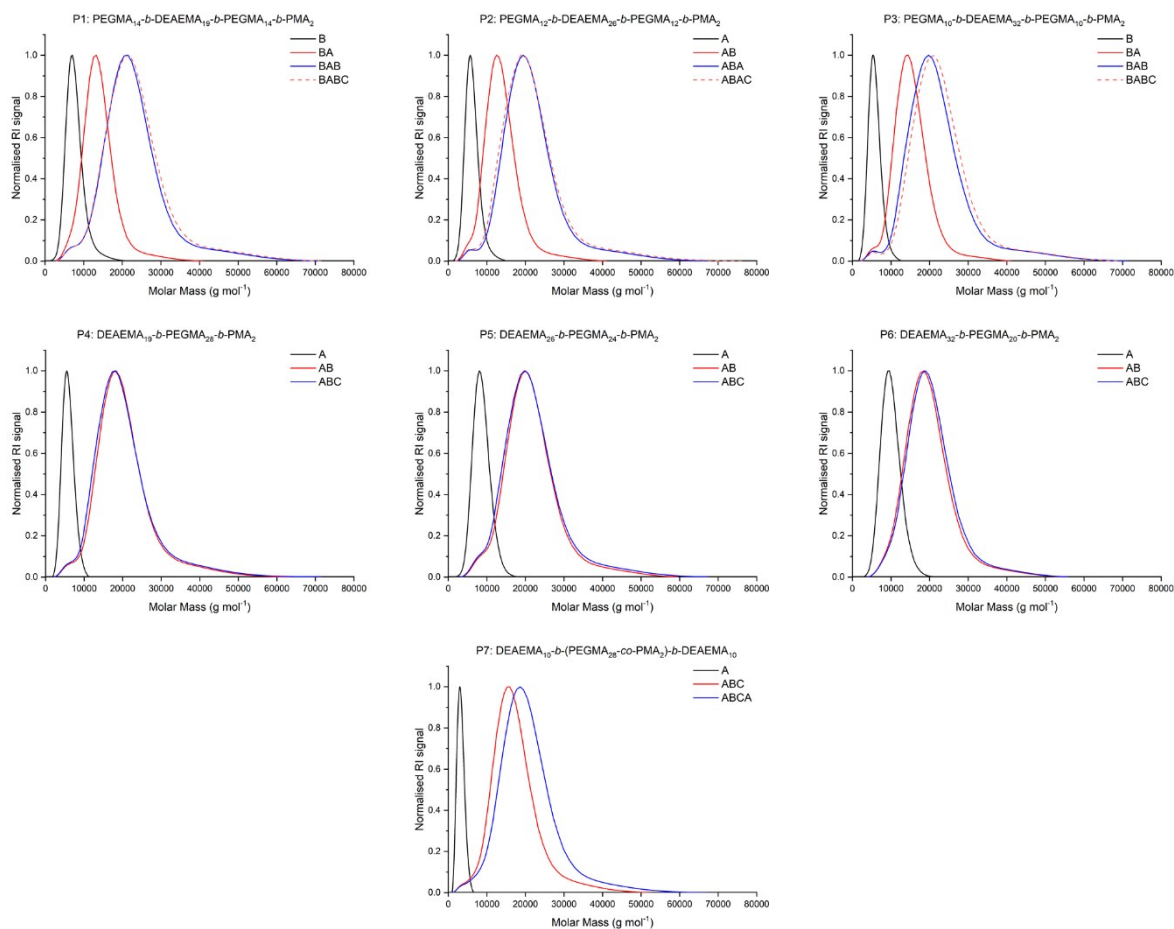

**Figure S1:** The GPC traces for all synthesised polymers and their precursors. The GPC traces of the homopolymers and the diblock copolymers are shown in black and red, respectively. The GPC traces resulted after the third and fourth addition (if any) are coloured in blue solid and red dotted lines, respectively.



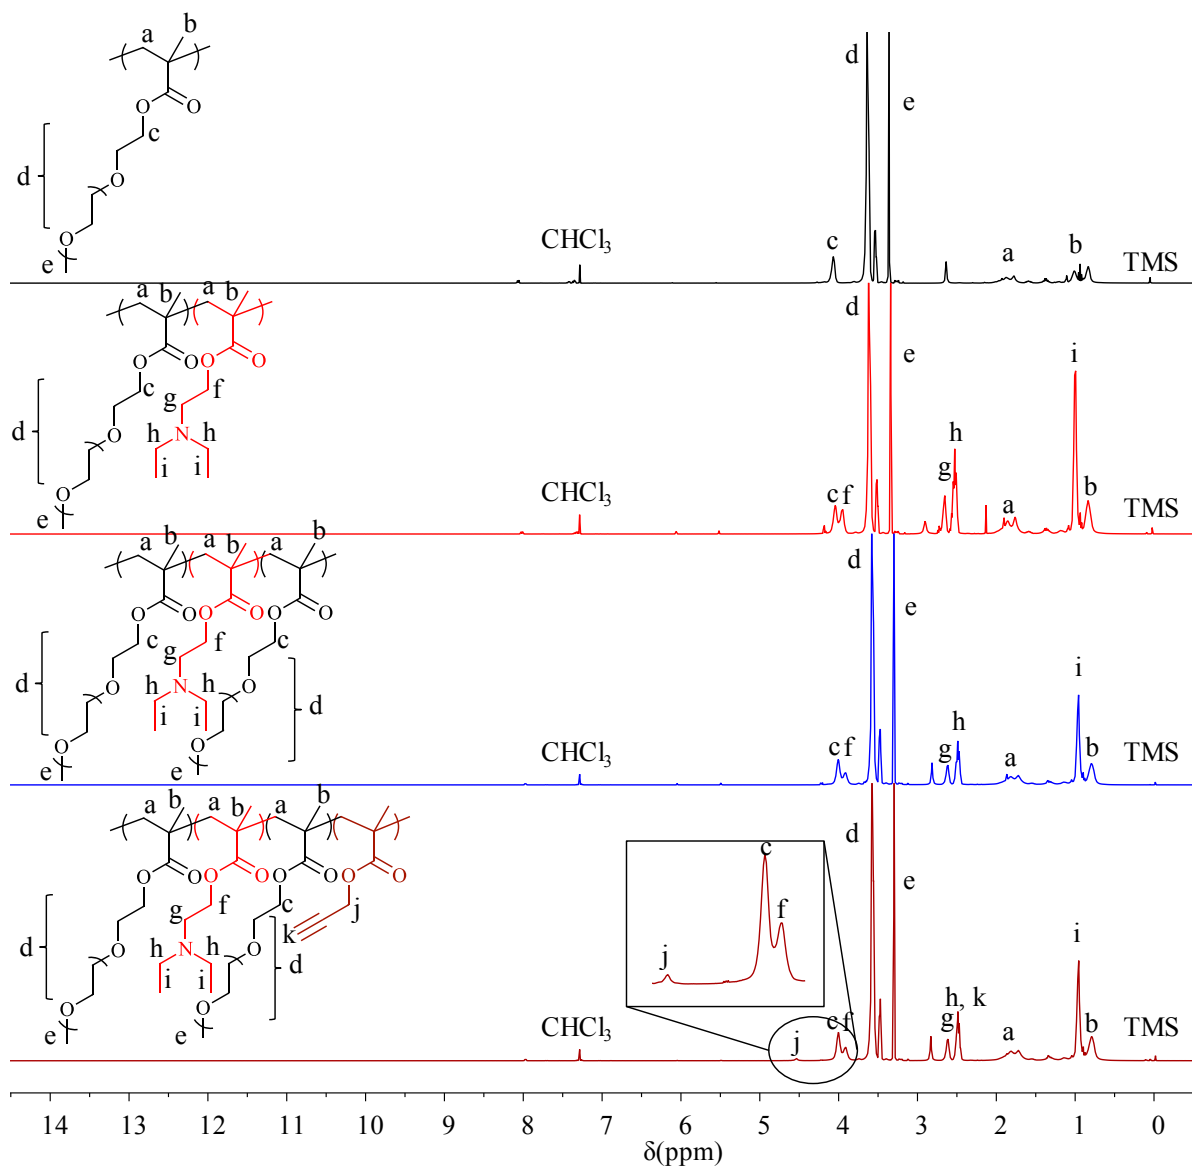

**Figure S2:** The  $^1\text{H}$  NMR spectra of Polymer 1 with theoretical chemical structure PEGMA<sub>14</sub>-*b*-DEAEMA<sub>19</sub>-*b*-PEGMA<sub>14</sub>-*b*-PMA<sub>2</sub> (shown in dark red-bottom) and its linear precursors: PEGMA<sub>14</sub> shown in black, PEGMA<sub>14</sub>-*b*-DEAEMA<sub>19</sub> shown in red and PEGMA<sub>14</sub>-*b*-DEAEMA<sub>19</sub>-*b*-PEGMA<sub>14</sub> shown in blue, respectively.

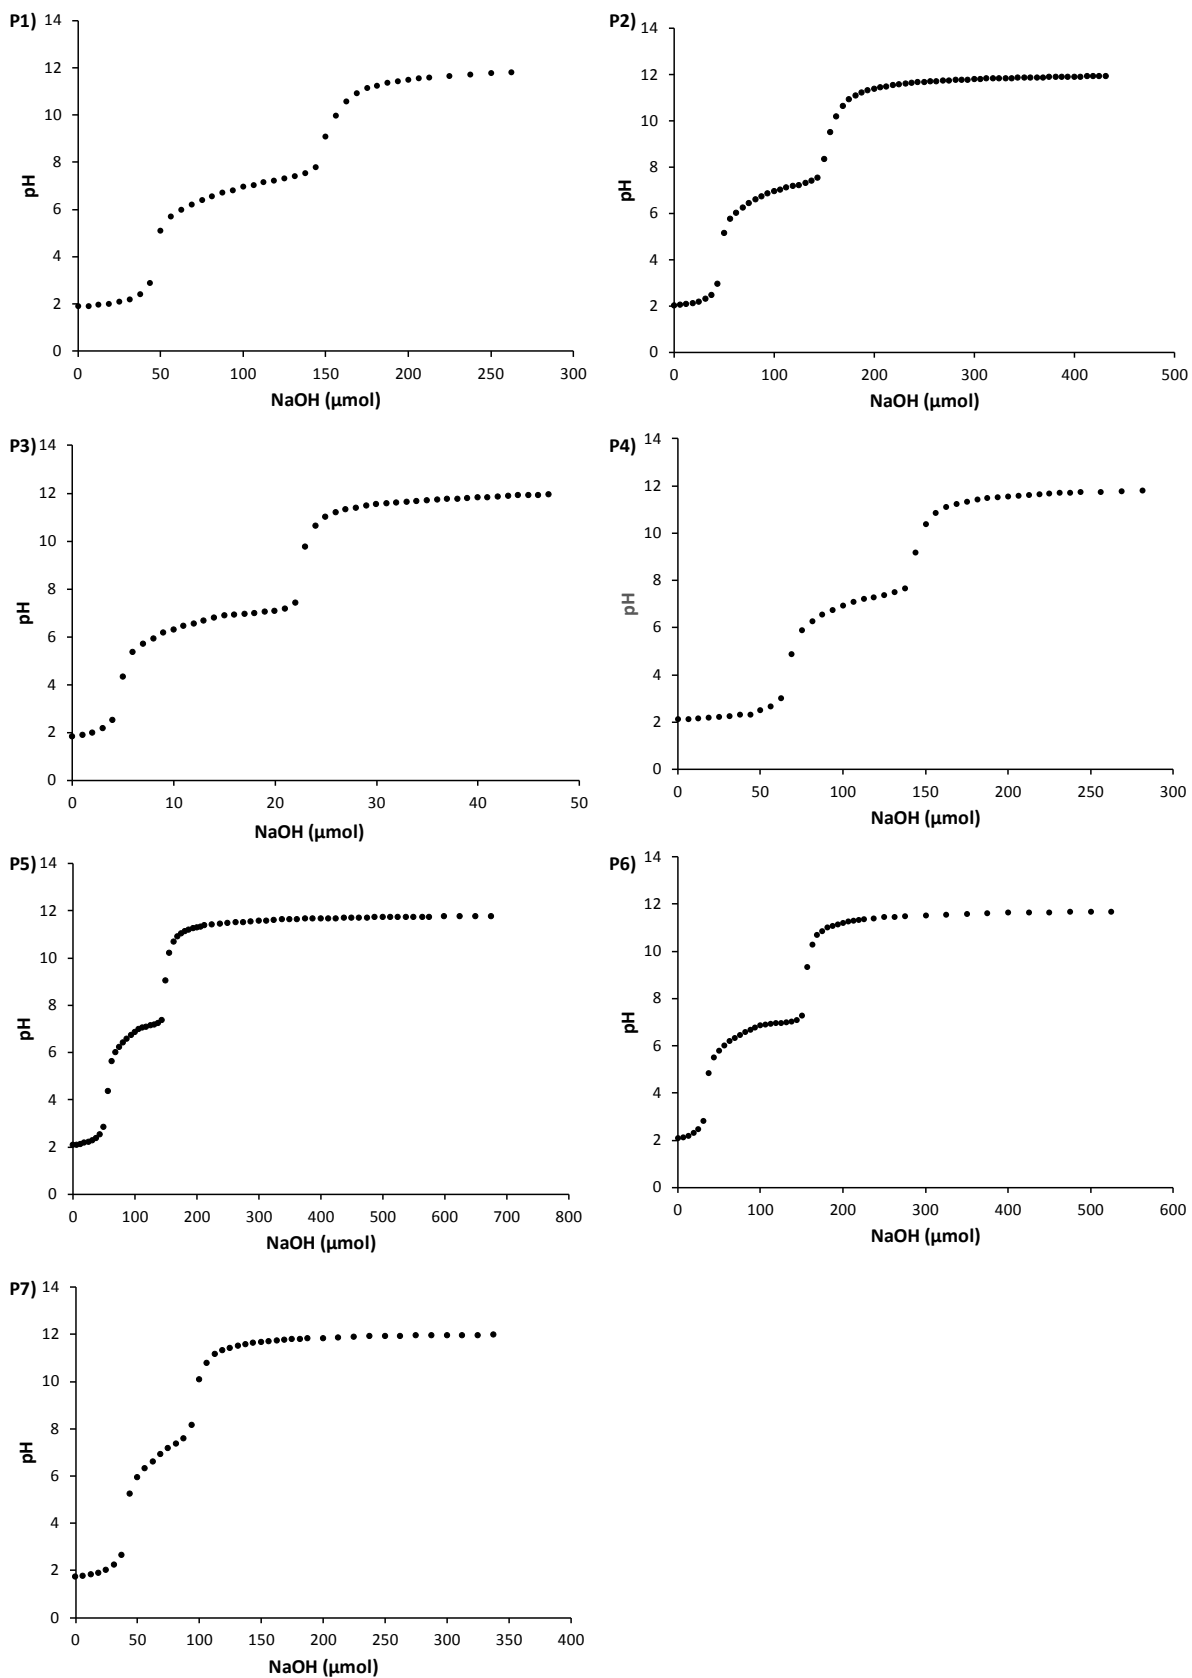

**Figure S3:** Titration curves of the polymers studied in the current study.

**Table S2:** Theoretical polymer structures and experimental diameter values and polydispersity (PDI) values, as resulted by dynamic light scattering (DLS) for i) non-loaded micelles at pH  $\approx$  8, ii) non-loaded micelles at pH  $\approx$  7, and iii) Au-loaded micelles at pH  $\approx$  7 and molar ratio of HAuCl<sub>4</sub> to DEAEMA 0.5 (Average of 2 runs)

| i) Non-loaded micelles at pH $\approx$ 8                                                                          |                                                                                                                       |                                      |           |                      |                   |                   |       |
|-------------------------------------------------------------------------------------------------------------------|-----------------------------------------------------------------------------------------------------------------------|--------------------------------------|-----------|----------------------|-------------------|-------------------|-------|
| No.                                                                                                               | Theoretical Polymer Structure                                                                                         | Diameter / nm                        |           |                      |                   |                   | PDI   |
|                                                                                                                   |                                                                                                                       | Average $\pm$ Std Dev (by Intensity) | Z-Average | Maximum by Intensity | Maximum by Number | Maximum by Volume |       |
| P1                                                                                                                | PEGMA <sub>14</sub> - <i>b</i> -DEAEMA <sub>19</sub> - <i>b</i> -PEGMA <sub>14</sub> - <i>b</i> -PMA <sub>2</sub>     | 15 $\pm$ 7 (98.6%)                   | 12.5      | 13.5                 | 6.5               | 7.5               | 0.182 |
|                                                                                                                   |                                                                                                                       | 4000 $\pm$ 1000 (1.4%)               |           | 4800.0               |                   |                   |       |
| P2                                                                                                                | PEGMA <sub>12</sub> - <i>b</i> -DEAEMA <sub>26</sub> - <i>b</i> -PEGMA <sub>12</sub> - <i>b</i> -PMA <sub>2</sub>     | 12 $\pm$ 4 (100%)                    | 11.2      | 11.7                 | 7.5               | 8.7               | 0.084 |
| P3                                                                                                                | PEGMA <sub>10</sub> - <i>b</i> -DEAEMA <sub>32</sub> - <i>b</i> -PEGMA <sub>10</sub> - <i>b</i> -PMA <sub>2</sub>     | 13 $\pm$ 4 (100%)                    | 12.1      | 11.7                 | 7.5               | 8.7               | 0.064 |
| P4                                                                                                                | DEAEMA <sub>19</sub> - <i>b</i> -PEGMA <sub>28</sub> - <i>b</i> -PMA <sub>2</sub>                                     | 27 $\pm$ 14 (72.0%)                  | 28.7      | 21.0                 | 11.7              | 13.5              | 0.366 |
|                                                                                                                   |                                                                                                                       | 150 $\pm$ 70 (28.0%)                 |           | 164.0                |                   |                   |       |
| P5                                                                                                                | DEAEMA <sub>26</sub> - <i>b</i> -PEGMA <sub>24</sub> - <i>b</i> -PMA <sub>2</sub>                                     | 21 $\pm$ 6 (100%)                    | 19.5      | 21.0                 | 11.7              | 13.5              | 0.062 |
| P6                                                                                                                | DEAEMA <sub>32</sub> - <i>b</i> -PEGMA <sub>20</sub> - <i>b</i> -PMA <sub>2</sub>                                     | 28 $\pm$ 9 (100%)                    | 24.7      | 24.4                 | 15.7              | 18.2              | 0.110 |
| P7                                                                                                                | DEAEMA <sub>10</sub> - <i>b</i> -(PEGMA <sub>28</sub> - <i>co</i> -PMA <sub>2</sub> )- <i>b</i> -DEAEMA <sub>10</sub> | 19 $\pm$ 7 (48.7%)                   | 16.8      | 18.2                 | 10.1              | 11.7              | 0.113 |
| ii) Non-loaded micelles at pH $\approx$ 7                                                                         |                                                                                                                       |                                      |           |                      |                   |                   |       |
| No.                                                                                                               | Theoretical Polymer Structure                                                                                         | Diameter / nm                        |           |                      |                   |                   | PDI   |
|                                                                                                                   |                                                                                                                       | Average $\pm$ Std Dev (by Intensity) | Z-Average | Maximum by Intensity | Maximum by Number | Maximum By Volume |       |
| P1                                                                                                                | PEGMA <sub>14</sub> - <i>b</i> -DEAEMA <sub>19</sub> - <i>b</i> -PEGMA <sub>14</sub> - <i>b</i> -PMA <sub>2</sub>     | 130 $\pm$ 70 (77.8%)                 | 29.7      | 106.0                | 1.5               | 1.7               | 1.000 |
|                                                                                                                   |                                                                                                                       | 2 $\pm$ 1 (17.4%)                    |           | 2.0                  |                   |                   |       |
|                                                                                                                   |                                                                                                                       | 14 $\pm$ 4 (4.8%)                    |           | 13.5                 |                   |                   |       |
| P2                                                                                                                | PEGMA <sub>12</sub> - <i>b</i> -DEAEMA <sub>26</sub> - <i>b</i> -PEGMA <sub>12</sub> - <i>b</i> -PMA <sub>2</sub>     | 19 $\pm$ 8 (92.6%)                   | 14.6      | 18.2                 | 1.7               | 10.1              | 0.262 |
|                                                                                                                   |                                                                                                                       | 1.9 $\pm$ 0.4 (5.8%)                 |           | 2.0                  |                   |                   |       |
|                                                                                                                   |                                                                                                                       | 4400 $\pm$ 900 (1.6%)                |           | 5560                 |                   |                   |       |
| P3                                                                                                                | PEGMA <sub>10</sub> - <i>b</i> -DEAEMA <sub>32</sub> - <i>b</i> -PEGMA <sub>10</sub> - <i>b</i> -PMA <sub>2</sub>     | 15 $\pm$ 6 (100%)                    | 12.9      | 13.5                 | 7.5               | 8.7               | 0.139 |
| P4                                                                                                                | DEAEMA <sub>19</sub> - <i>b</i> -PEGMA <sub>28</sub> - <i>b</i> -PMA <sub>2</sub>                                     | 29 $\pm$ 13 (72.6%)                  | 30.2      | 24.4                 | 13.5              | 15.7              | 0.413 |
|                                                                                                                   |                                                                                                                       | 200 $\pm$ 100 (27.4%)                |           | 190.0                |                   |                   |       |
| P5                                                                                                                | DEAEMA <sub>26</sub> - <i>b</i> -PEGMA <sub>24</sub> - <i>b</i> -PMA <sub>2</sub>                                     | 23 $\pm$ 7 (100%)                    | 21.2      | 21.0                 | 13.5              | 15.7              | 0.066 |
| P6                                                                                                                | DEAEMA <sub>32</sub> - <i>b</i> -PEGMA <sub>20</sub> - <i>b</i> -PMA <sub>2</sub>                                     | 29 $\pm$ 9 (100%)                    | 26.8      | 28.2                 | 15.7              | 18.2              | 0.109 |
| P7                                                                                                                | DEAEMA <sub>10</sub> - <i>b</i> -(PEGMA <sub>28</sub> - <i>co</i> -PMA <sub>2</sub> )- <i>b</i> -DEAEMA <sub>10</sub> | 19 $\pm$ 9 (48.7%)                   | 17.8      | 18.2                 | 1.5               | 1.7               | 0.722 |
|                                                                                                                   |                                                                                                                       | 110 $\pm$ 50 (35.7%)                 |           | 5560                 |                   |                   |       |
|                                                                                                                   |                                                                                                                       | 2.1 $\pm$ 0.4 (13.8%)                |           | 2.3                  |                   |                   |       |
| iii) Au-loaded micelles at pH $\approx$ 7 and molar ratio of HAuCl <sub>4</sub> to DEAEMA 0.5 (Average of 2 runs) |                                                                                                                       |                                      |           |                      |                   |                   |       |
| No.                                                                                                               | Theoretical Polymer Structure                                                                                         | Diameter / nm                        |           |                      |                   |                   | PDI   |
|                                                                                                                   |                                                                                                                       | Average $\pm$ Std Dev (by Intensity) | Z-Average | Maximum by Intensity | Maximum by Number | Maximum By Volume |       |
| P1                                                                                                                | PEGMA <sub>14</sub> - <i>b</i> -DEAEMA <sub>19</sub> - <i>b</i> -PEGMA <sub>14</sub> - <i>b</i> -PMA <sub>2</sub>     | 200 $\pm$ 70 (57.9%)                 | 68        | 31                   | 17.0              | 20.0              | 0.514 |
|                                                                                                                   |                                                                                                                       | 35 $\pm$ 9 (39.4%)                   |           |                      |                   |                   |       |
|                                                                                                                   |                                                                                                                       | 5100 $\pm$ 550 (3.1%)                |           |                      |                   |                   |       |
| P2                                                                                                                | PEGMA <sub>12</sub> - <i>b</i> -DEAEMA <sub>26</sub> - <i>b</i> -PEGMA <sub>12</sub> - <i>b</i> -PMA <sub>2</sub>     | 250 $\pm$ 100 (80%)                  | 136       | 31                   | 18.0              | 20.0              | 0.556 |
|                                                                                                                   |                                                                                                                       | 14 $\pm$ 5 (15.7%)                   |           |                      |                   |                   |       |
|                                                                                                                   |                                                                                                                       | 4500 $\pm$ 900 (4.3%)                |           |                      |                   |                   |       |
| P3                                                                                                                | PEGMA <sub>10</sub> - <i>b</i> -DEAEMA <sub>32</sub> - <i>b</i> -PEGMA <sub>10</sub> - <i>b</i> -PMA <sub>2</sub>     | 180 $\pm$ 100 (61.9%)                | 79        | 31                   | 19.6              | 21.0              | 0.451 |
|                                                                                                                   |                                                                                                                       | 30 $\pm$ 20 (37.2%)                  |           |                      |                   |                   |       |
|                                                                                                                   |                                                                                                                       | 2500 $\pm$ 400 (0.9%)                |           |                      |                   |                   |       |
| P4                                                                                                                | DEAEMA <sub>19</sub> - <i>b</i> -PEGMA <sub>28</sub> - <i>b</i> -PMA <sub>2</sub>                                     | 160 $\pm$ 90 (79.6%)                 | 82        | 33                   | 20.0              | 24.4              | 0.489 |
|                                                                                                                   |                                                                                                                       | 20 $\pm$ 5 (18%)                     |           |                      |                   |                   |       |
|                                                                                                                   |                                                                                                                       | 4900 $\pm$ 700 (2.5%)                |           |                      |                   |                   |       |
|                                                                                                                   |                                                                                                                       | 300 $\pm$ 100 (85.9%)                |           |                      |                   |                   |       |

|    |                                                                                                                       |                   |    |    |      |      |       |
|----|-----------------------------------------------------------------------------------------------------------------------|-------------------|----|----|------|------|-------|
|    |                                                                                                                       | 32 ± 8 (11.7%)    |    |    |      |      |       |
|    |                                                                                                                       | 5000 ± 500 (2.4%) |    |    |      |      |       |
| P6 | DEAEMA <sub>32</sub> - <i>b</i> -PEGMA <sub>20</sub> - <i>b</i> -PMA <sub>2</sub>                                     | 190 ± 90 (69.4%)  | 84 | 39 | 21.0 | 25.0 | 0.565 |
|    |                                                                                                                       | 40 ± 10 (28.7%)   |    |    |      |      |       |
|    |                                                                                                                       | 5100 ± 600 (2%)   |    |    |      |      |       |
| P7 | DEAEMA <sub>10</sub> - <i>b</i> -(PEGMA <sub>28</sub> - <i>co</i> -PMA <sub>2</sub> )- <i>b</i> -DEAEMA <sub>10</sub> | 220 ± 90 (45.1%)  | 64 | 31 | 18   | 21.0 | 0.436 |
|    |                                                                                                                       | 40 ± 20 (51.9%)   |    |    |      |      |       |
|    |                                                                                                                       | 4900 ± 700        |    |    |      |      |       |

(a) After 24h

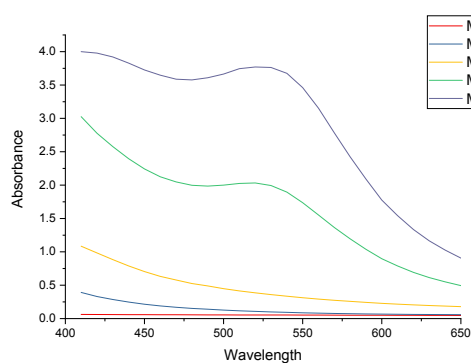

(b) After 48h

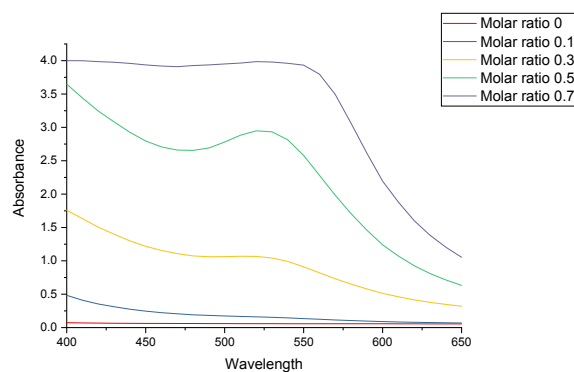

**Figure S4:** Original UV-Vis spectra of Polymer 6, DEAEMA<sub>32</sub>-*b*-PEGMA<sub>20</sub>-*b*-PMA<sub>2</sub>, at different ratios of HAuCl<sub>4</sub> to DEAEMA groups (a) after 24h, and (b) after 48h.

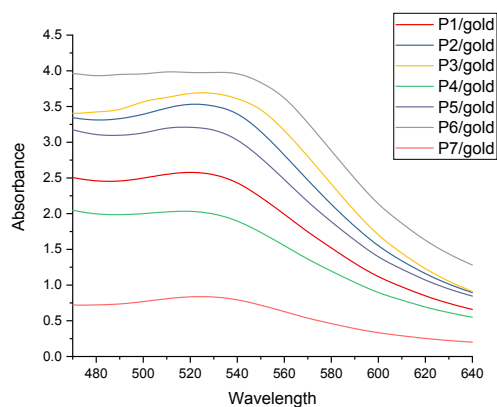

**Figure S5:** Original UV-Vis spectra of all the polymers at HAuCl<sub>4</sub> to DEAEMA ratio of 0.5 after 24h.

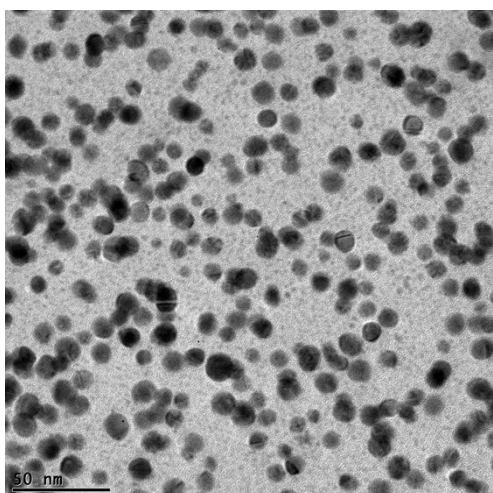

**Figure S6:** TEM image of the AuNPs formed by Polymer 6 with theoretical polymer structure  $\text{DEAEMA}_{32}\text{-}b\text{-PEGMA}_{20}\text{-}b\text{-PMA}_2$  at a  $\text{HAuCl}_4\text{:DEAEMA}$  molar ratio of 0.5.

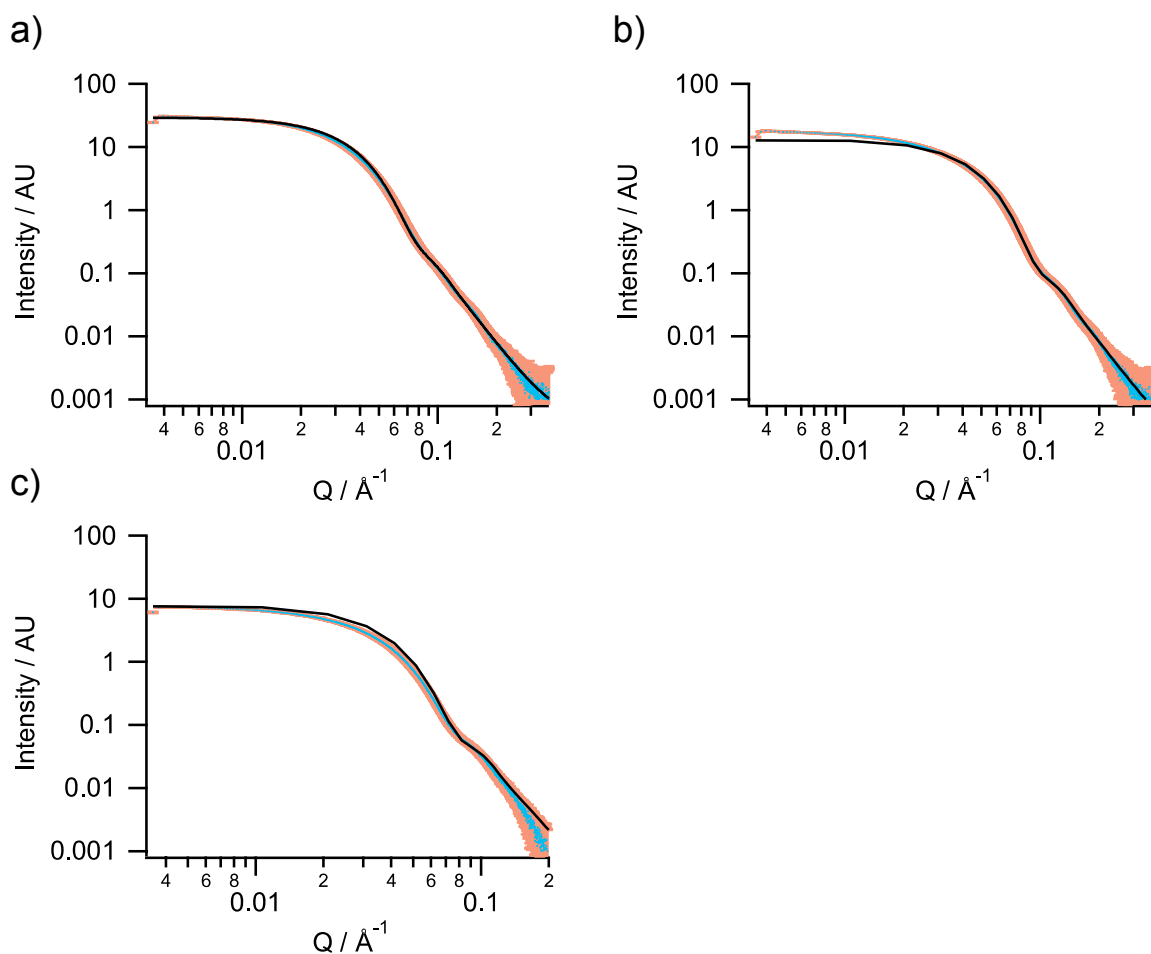

**Figure S7:** Small Angle X-ray Scattering (SAXS) from selected gold nanoparticles, synthesized using examples of different polymer architectures. (a) A PEGMA-DEAEMA-PEGMA triblock assumed to form classical spherical micelles, Polymer 3 (numbering as per Table 1); (b) a PEGMA-DEAEMA diblock assumed to form classical spherical micelles, Polymer 6; (c) a DEAEMA-PEGMA-DEAEMA triblock assumed to form flower micelles, Polymer 7. Plots show scattered intensity (cyan markers with light red error bars) versus momentum transfer,  $Q$ , together with fits (solid black line) to a sphere model.

**Table S3:** Sphere model fitting parameters for SAXS data, corresponding to solid black lines in Figure S4. Parameter names correspond to the SphereModel package on SANSView (see

| No. of Polymer | $R / \text{\AA}$ | Dispersity | Scale                | Background         |
|----------------|------------------|------------|----------------------|--------------------|
| P3             | 47               | 0.28       | $2.5 \times 10^{-5}$ | $4 \times 10^{-4}$ |
| P6             | 40               | 0.23       | $2.2 \times 10^{-5}$ | $1 \times 10^{-4}$ |
| P7             | 50               | 0.22       | $7.0 \times 10^{-6}$ | $1 \times 10^{-4}$ |

methods). Scattering length densities used are stated in Materials and Methods.

**Table S4:** Comparison of nanoparticle size including the polymer corona (hydrodynamic diameter from DLS) and including the gold core (from SAXS fits).

| <b>No. of Polymer</b> | <b>Architecture</b> | <b>Presumed structure</b> | <b>Overall diameter / nm (DLS)</b> | <b>Gold core diameter / nm (SAXS)</b> |
|-----------------------|---------------------|---------------------------|------------------------------------|---------------------------------------|
| P3                    | BAB                 | Core-shell micelle        | 30.5                               | 9.4                                   |
| P6                    | AB                  | Core-shell micelle        | 28.0                               | 8.0                                   |
| P7                    | ABA                 | Flower micelle            | 30.5                               | 10.0                                  |

## References

- 1 W. J. Brittain and I. B. Dicker, *Macromolecules*, 1989, **22**, 1054-1057.
- 2 N. Ghasdian, M. A. Ward and T. K. Georgiou, *Chem. Commun.*, 2014, **50**, 7114-7116).
- 3 N. H. Raduan, T. S. Horozov and T. K. Georgiou, *Soft Matter*, 2010, **6**, 2321-2329.
- 4 M. A. Ward and T. K. Georgiou, *J. Polym. Sci. A Polym. Chem.*, 2010, **48**, 775-783.
- 5 M. A. Ward and T. K. Georgiou, *Soft Matter*, 2012, **8**, 2737-2745.
- 6 M. A. Ward and T. K. Georgiou, *Polym. Chem.*, 2013, **4**, 1893-1902.
- 7 M. A. Ward and T. K. Georgiou, *J. Polym. Sci. Part A: Polym. Chem.*, 2013, **51**, 2850-2859.
- 8 A. P. Constantinou and T. K. Georgiou, *Polym. Chem.*, 2016, **7**, 2045-2056.
- 9 D. R. Carroll, A. P. Constantinou, N. Stingelin and T. K. Georgiou, *Polym. Chem.*, 2018, **9**, 3450-3454.
- 10 A. P. Constantinou, H. Zhao, M. C. McGilvery, A. E. Porter and T. K. Georgiou, *Eur. Polym. J.*, 2017, **9**.
- 11 A. I. Triftaridou, M. Vamvakaki and C. S. Patrickios, *Polymer*, 2002, **43**, 2921-2926.
- 12 N. A. Hadjiantoniou, T. Krasia-Christoforou, E. Loizou, L. Porcar and C. S. Patrickios, *Macromolecules*, 2010, **43**, 2713-2720.
- 13 Soft Condensed Matter - Small Angle Scattering, <http://www.diamond.ac.uk/Home/Beamlines/small-angle/l22.html>, Accessed 2019.
- 14 SansView, <http://danse.chem.utk.edu/sansview.html>, Accessed 2019.
- 15 NIST centre for neutron research - Neutron activation and scattering calculator, <https://www.ncnr.nist.gov/resources/activation/>, Accessed 2019.
- 16 J. Rumble, *CRC Handbook of Chemistry and Physics*, CRC Press, Taylor & Francis group, 2018.
